# Supplementary material for: The p38/MK2-Driven Exchange between Tristetraprolin and HuR Regulates AU–Rich Element–Dependent Translation
Source: PLOS journal article supplement (doi:10.1371/journal.pgen.1002977), 2012-09-27

Figure S2

A

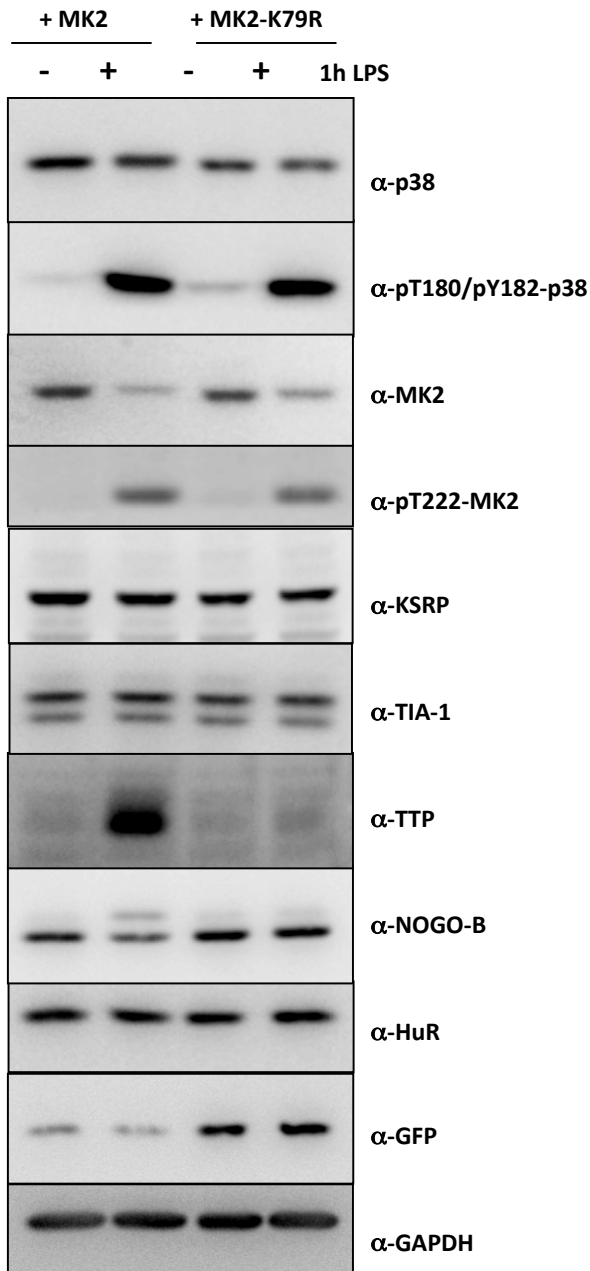

B

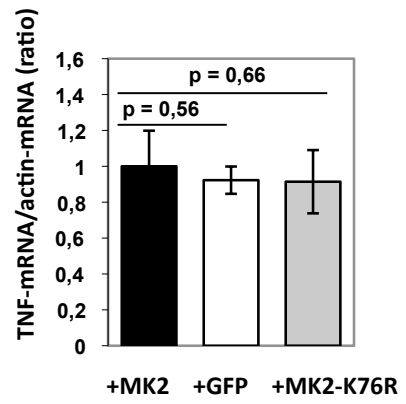

C

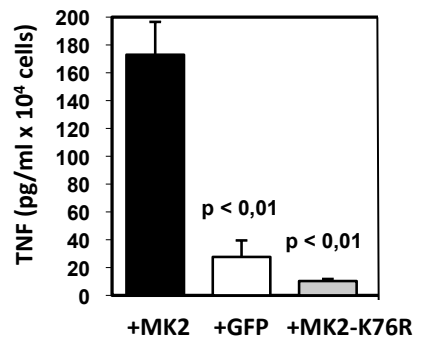

Supplement: S2 (10.1371/journal.pgen.1002977.s002) [file journal.pgen.1002977.s002]
